# Supplementary material for: Increased genomic prediction accuracy in wheat breeding using a large Australian panel
Source: PubMed Central journal article supplement (PMC5668360; doi:10.1007/s00122-017-2975-4), 2017-09-08
Supplement: 122_2017_2975_MOESM1_ESM.pdf [file 122_2017_2975_MOESM1_ESM.pdf]

Supplementary material for:

## **Increased genomic prediction accuracy for wheat breeding using a large Australian panel**

Adam Norman<sup>1,3</sup>, Julian Taylor<sup>1</sup>, Emi Tanaka<sup>2</sup>, Paul Telfer<sup>1,3</sup>, James Edwards<sup>1,3</sup>, Jean-Pierre Martinant<sup>4</sup> and Haydn Kuchel<sup>1,3</sup>

<sup>1</sup>School of Agriculture, Food & Wine  
University of Adelaide, Waite Campus  
Glen Osmond, South Australia, Australia  
Tel.: +61 4 0065 6012  
E-mail: adam.norman@adelaide.edu.au

<sup>2</sup>National Institute for Applied Statistics Research Australia (NIASRA)  
School of Mathematics and Applied Statistics  
University of Wollongong  
Wollongong, New South Wales, Australia

<sup>3</sup>Australian Grain Technologies Pty Ltd  
Perkins Building, Roseworthy Campus  
Roseworthy, South Australia, Australia

<sup>4</sup>Limagrain Field Seeds Pty Ltd  
Centre of Research, Chappes, France

Correspondence: adam.norman@agtbreeding.com.au

**Table 1** Summary of the genetic material used in the study

|                    | # lines | Derivation                      | Source                       | Use                                  |
|--------------------|---------|---------------------------------|------------------------------|--------------------------------------|
| AWP                | 10375   | -                               | -                            | Association panel                    |
| PYT-South          | 7622    | F <sub>2</sub> - F <sub>5</sub> | AGT                          | Association panel                    |
| AYT-South          | 865     | F <sub>5</sub> - F <sub>8</sub> | AGT                          | Association panel                    |
| AYT-Other          | 1888    | F <sub>5</sub> - F <sub>8</sub> | AGT                          | Association panel                    |
| Kukri / RAC875     | 157     | DH                              | Bennett et al<br>(2012)      | Anchor markers &<br>map construction |
| Kukri / Excalibur  | 132     | DH                              | Edwards<br>(2012)            | Anchor markers &<br>map construction |
| Halberd / Kennedy  | 121     | DH                              | Daryl Mares<br>(pers. comm.) | Map construction                     |
| Mace / Gladius     | 176     | DH                              | (Telfer, 2013)               | Map construction                     |
| Scout / Mace       | 226     | DH                              | (Telfer, 2013)               | Map construction                     |
| Scout / Gladius    | 369     | DH                              | (Telfer, 2013)               | Map construction                     |
| RAC1548 / Gladius  | 132     | DH                              | (Telfer, 2013)               | Map construction                     |
| AUS17750 / Gladius | 116     | DH                              | (Telfer, 2013)               | Map construction                     |
| AUS17840 / Gladius | 124     | DH                              | (Telfer, 2013)               | Map construction                     |

## References

- Bennett D, Izanloo A, Edwards J, Kuchel H, Chalmers K, Tester M, Reynolds M, Schnurbusch T, Langridge P (2012) Identification of novel quantitative trait loci for days to ear emergence and flag leaf glaucousness in a bread wheat (*Triticum aestivum* L.) population adapted to southern Australian conditions. *Theoretical and Applied Genetics* 124(4):697–711
- Edwards J (2012) A genetic analysis of drought related traits in hexaploid wheat. PhD thesis, The University of Adelaide
- Telfer P (2013) Production of doubled haploid wheat populations for heat tolerance research, unpublished work
