# Supplementary material for: Increased genomic prediction accuracy in wheat breeding using a large Australian panel
Source: PubMed Central journal article supplement (PMC5668360; doi:10.1007/s00122-017-2975-4), 2017-09-08
Supplement: 122_2017_2975_MOESM2_ESM.pdf [file 122_2017_2975_MOESM2_ESM.pdf]

Supplementary material for:

## **Increased genomic prediction accuracy for wheat breeding using a large Australian panel**

Adam Norman<sup>1,3</sup>, Julian Taylor<sup>1</sup>, Emi Tanaka<sup>2</sup>, Paul Telfer<sup>1,3</sup>, James Edwards<sup>1,3</sup>, Jean-Pierre Martinant<sup>4</sup> and Haydn Kuchel<sup>1,3</sup>

<sup>1</sup>School of Agriculture, Food & Wine  
University of Adelaide, Waite Campus  
Glen Osmond, South Australia, Australia  
Tel.: +61 4 0065 6012  
E-mail: adam.norman@adelaide.edu.au

<sup>2</sup>National Institute for Applied Statistics Research Australia (NIASRA)  
School of Mathematics and Applied Statistics  
University of Wollongong  
Wollongong, New South Wales, Australia

<sup>3</sup>Australian Grain Technologies Pty Ltd  
Perkins Building, Roseworthy Campus  
Roseworthy, South Australia, Australia

<sup>4</sup>Limagrain Field Seeds Pty Ltd  
Centre of Research, Chappes, France

Correspondence: adam.norman@agtbreeding.com.au

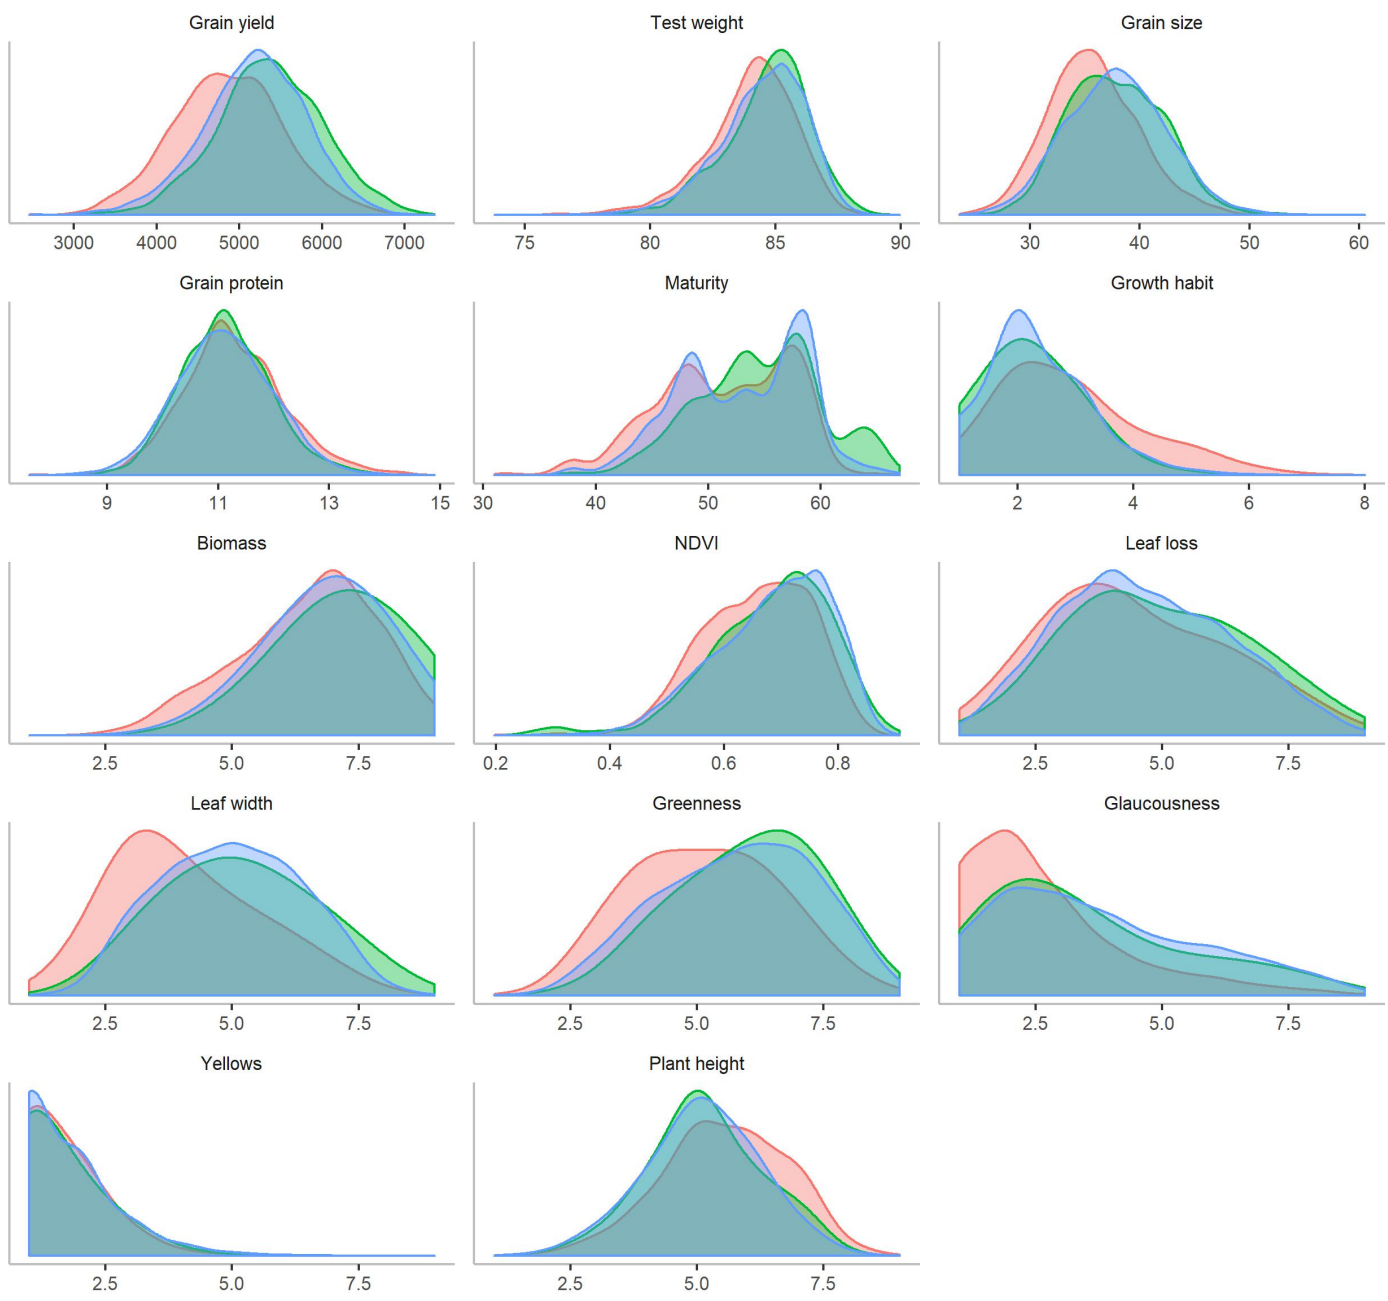

Germplasm Set ■ AYT-Other ■ AYT-South ■ PYT-South
